# Supplementary material for: Hepatic Hedgehog Signaling Participates in the Crosstalk between Liver and Adipose Tissue in Mice by Regulating FGF21
Source: MDPI journal article supplement (doi:10.3390/cells11101680), 2022-05-18
Supplement: s1 [file s1]

# Hepatic hedgehog signaling participates in the cross-talk between liver and adipose tissue in mice by regulating FGF21

Fritzi Ott<sup>1,2#</sup> and Christiane Körner<sup>1,2#</sup>, Kim Werner<sup>2</sup>, Martin Gericke<sup>3</sup>, Ines Liebscher<sup>1</sup>, Donald Lobsien<sup>4,5</sup>, Silvia Radrezza<sup>6</sup>, Andrej Shevchenko<sup>6</sup>, Ute Hofmann<sup>7</sup>, Jürgen Kratzsch<sup>8</sup>, Rolf Gebhardt<sup>1</sup>, Thomas Berg<sup>2</sup>, Madlen Matz-Soja<sup>1,2\*</sup>

<sup>1</sup> Rudolf-Schönheimer Institute for Biochemistry, Faculty of Medicine, Leipzig University, 04103 Leipzig, Germany; [fritzi.ott@medizin.uni-leipzig.de](mailto:fritzi.ott@medizin.uni-leipzig.de); [christiane.koerner@medizin.uni-leipzig.de](mailto:christiane.koerner@medizin.uni-leipzig.de); [kimfabienne66@gmail.com](mailto:kimfabienne66@gmail.com); [ivs.gebh@t-online.de](mailto:ivs.gebh@t-online.de)

<sup>2</sup> Division of Hepatology, Clinic and Polyclinic for Oncology, Gastroenterology, Hepatology, Infectious Diseases, and Pneumology, University Hospital Leipzig, 04103 Leipzig, Germany; [thomas.berg@medizin.uni-leipzig.de](mailto:thomas.berg@medizin.uni-leipzig.de)

<sup>3</sup> Institute for Anatomy, Faculty of Medicine, Leipzig University, 04103 Leipzig, Germany; [martin.gericke@medizin.uni-leipzig.de](mailto:martin.gericke@medizin.uni-leipzig.de)

<sup>4</sup> Institute for Diagnostic and Interventional Radiology and Neuroradiology, Helios Clinic Erfurt; 99089 Erfurt, Germany; [donald.lobsien@helios-gesundheit.de](mailto:donald.lobsien@helios-gesundheit.de)

<sup>5</sup> Institute for Neuroradiology, University Hospital Leipzig, 04103 Leipzig, Germany

<sup>6</sup> Max Planck Institute of Molecular Cell Biology and Genetics, 01307 Dresden, Germany; [radrezza@mpi-cbg.de](mailto:radrezza@mpi-cbg.de); [shevchenko@mpi-cbg.de](mailto:shevchenko@mpi-cbg.de)

<sup>7</sup> Dr. Margarete Fischer-Bosch Institute of Clinical Pharmacology, University of Tübingen, 70376 Stuttgart, Germany; [ute.hofmann@ikp-stuttgart.de](mailto:ute.hofmann@ikp-stuttgart.de)

<sup>8</sup> Institute of Laboratory Medicine, Clinical Chemistry and Molecular Diagnostics, Faculty of Medicine; Leipzig University, 04103 Leipzig, Germany; [juergen.kratzsch@medizin.uni-leipzig.de](mailto:juergen.kratzsch@medizin.uni-leipzig.de)

<sup>#</sup> These authors contributed equally to the manuscript.

<sup>\*</sup> Correspondence: Madlen Matz-Soja [madlen.matz-soja@medizin.uni-leipzig.de](mailto:madlen.matz-soja@medizin.uni-leipzig.de)

# Supplementary Figures

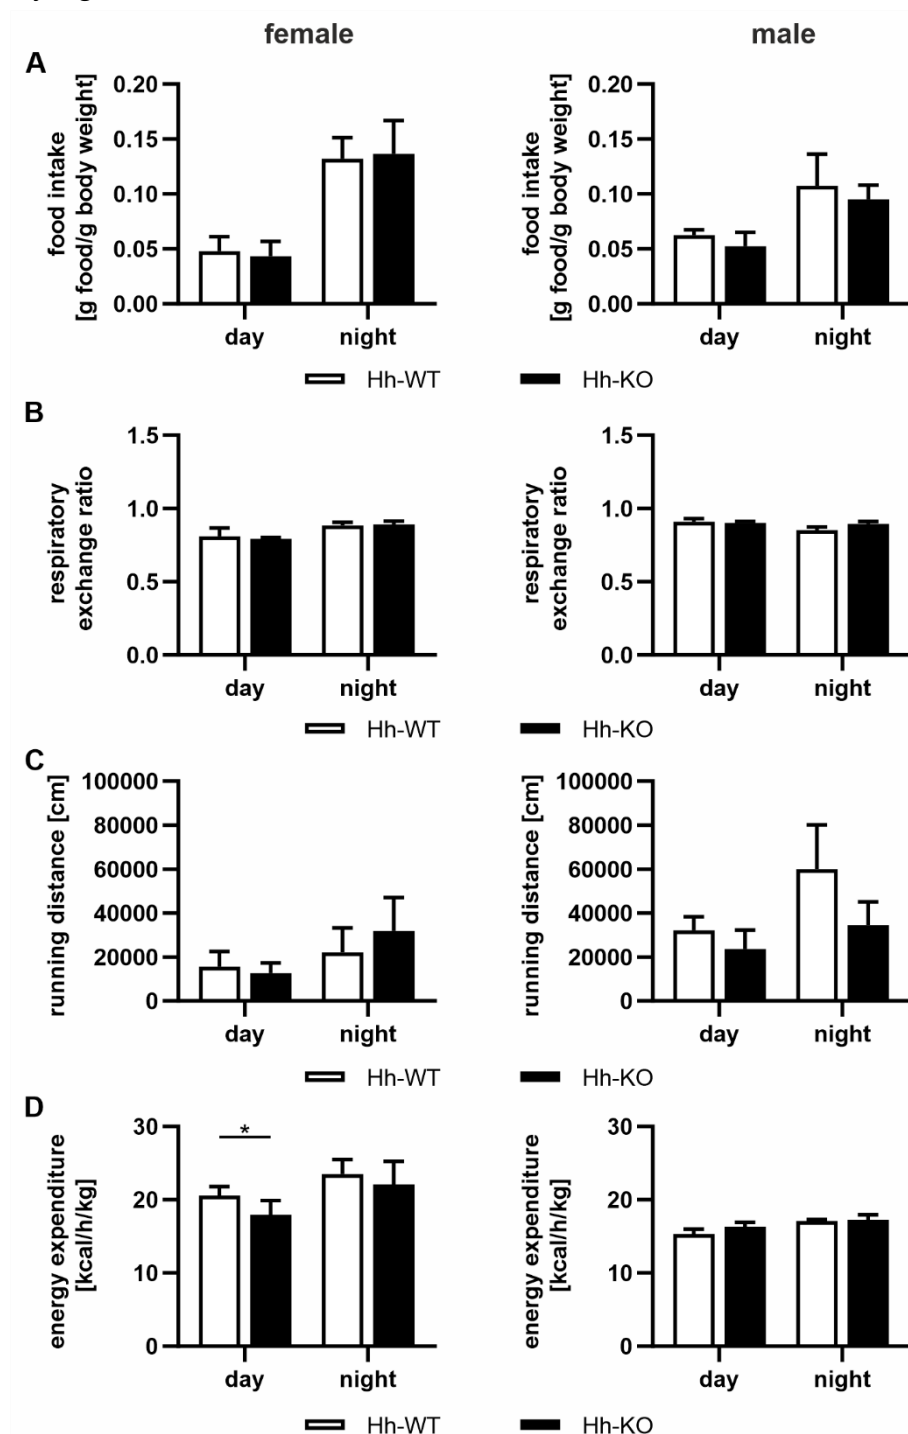

**Figure S1.** Metabolic cage analysis. Female and male Hh-WT and Hh-KO mice were fed a chow diet and examined in a metabolic cage with respect to (A) food consumption, (B) respiratory exchange ratio, (C) running distance and (D) energy expenditure. n = 4-6, multiple unpaired t tests with p values \* ≤ 0.05.

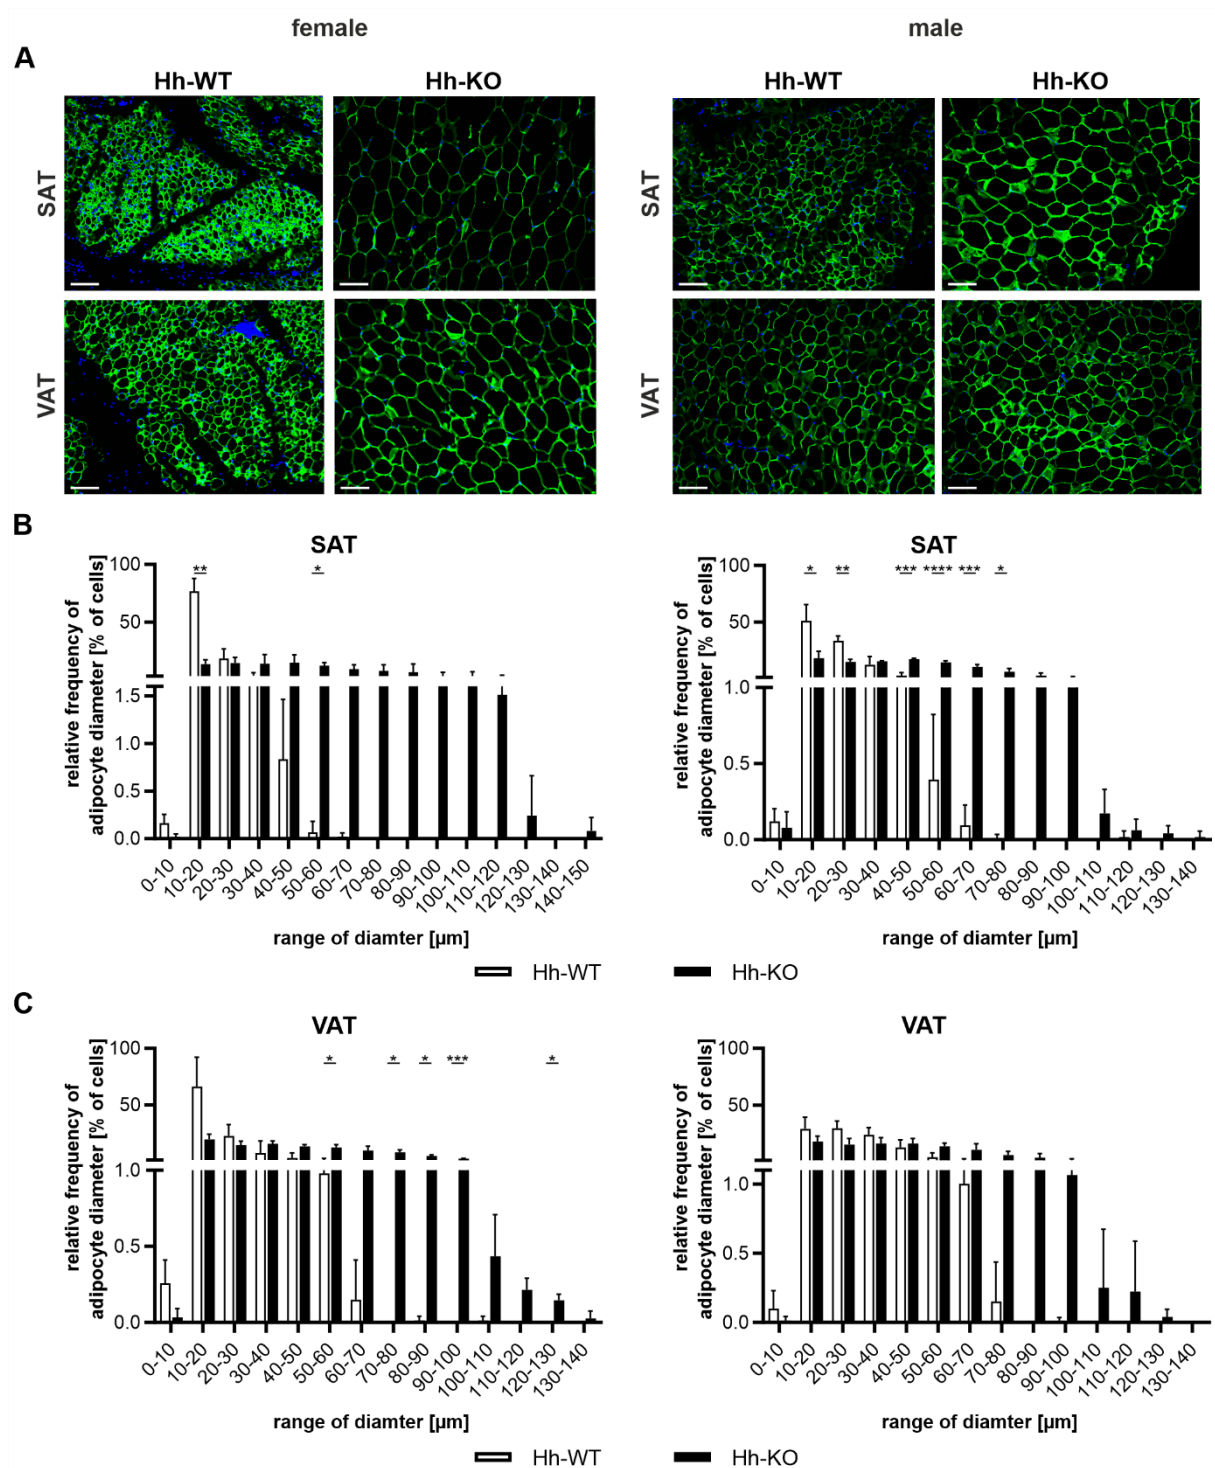

**Figure S2.** Quantification of adipocyte size. **(A)** Perilipin staining in SAT and VAT in male and female Hh-WT and Hh-KO mice. Scale bars indicate 100  $\mu\text{m}$ . **(B-C)** Relative frequency of adipocyte diameter in percent of cells in **(B)** SAT and **(C)** VAT from male and female Hh-WT and Hh-KO mice.  $n = 3-5$ , multiple unpaired  $t$  tests with  $p$  values  $* \leq 0.05$ ;  $** \leq 0.01$ ;  $*** \leq 0.001$ ;  $**** \leq 0.0001$ .

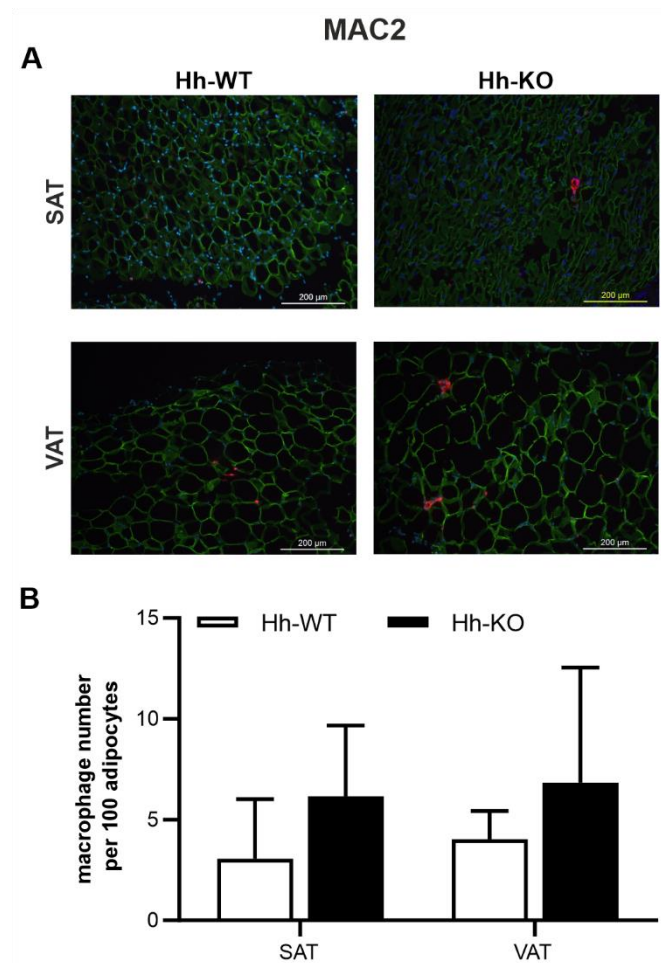

**Figure S3.** Characterization of inflammation in adipose tissue. **(A)** MAC-2 staining in SAT and VAT from male Hh-WT and Hh-KO mice. Scale bars indicate 200  $\mu$ m. **(B)** Macrophage number per 100 adipocytes in SAT and VAT of male Hh-WT and Hh-KO mice. n = 4-5, multiple unpaired t tests.

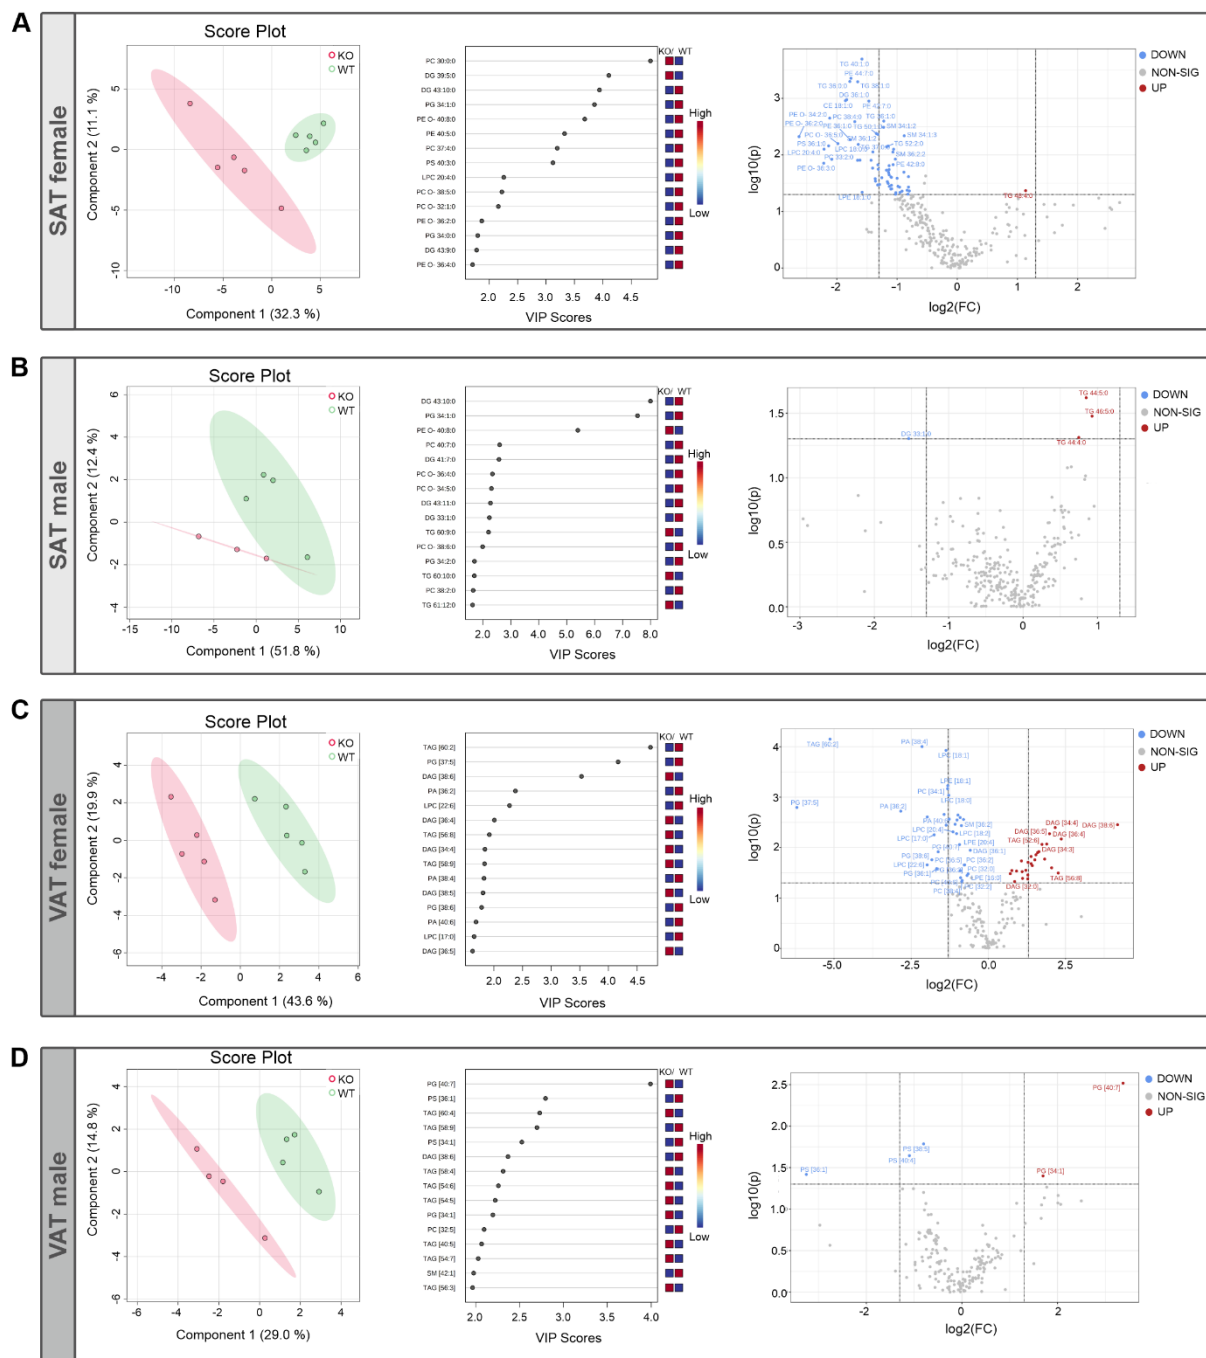

**Figure S4.** Lipidomic profiles of adipose tissue. Shotgun lipidomic analyses were performed on SAT and VAT from male and female Hh-WT and Hh-KO mice;  $n = 3-5$ . (A-D) Partial least squares discriminant analysis (PLS-DA) score plots generated from each genotype and sex. Variable of importance in projection (VIP) scores of each lipid species used in the PLS-DA. Lipids contributing meaningfully to the PLS-DA model with a PC1 VIP score  $>1.0$  constituting 20% of the lipids tested (inset pie-chart). Volcano plot showing differentially expressed lipids between different libraries. A  $p$  value  $< 0.05$  was used as the threshold to judge the significance of differences in lipid levels. Lipid species are marked as upregulated (red dots), downregulated (blue dots) or nonsignificant (gray dots).

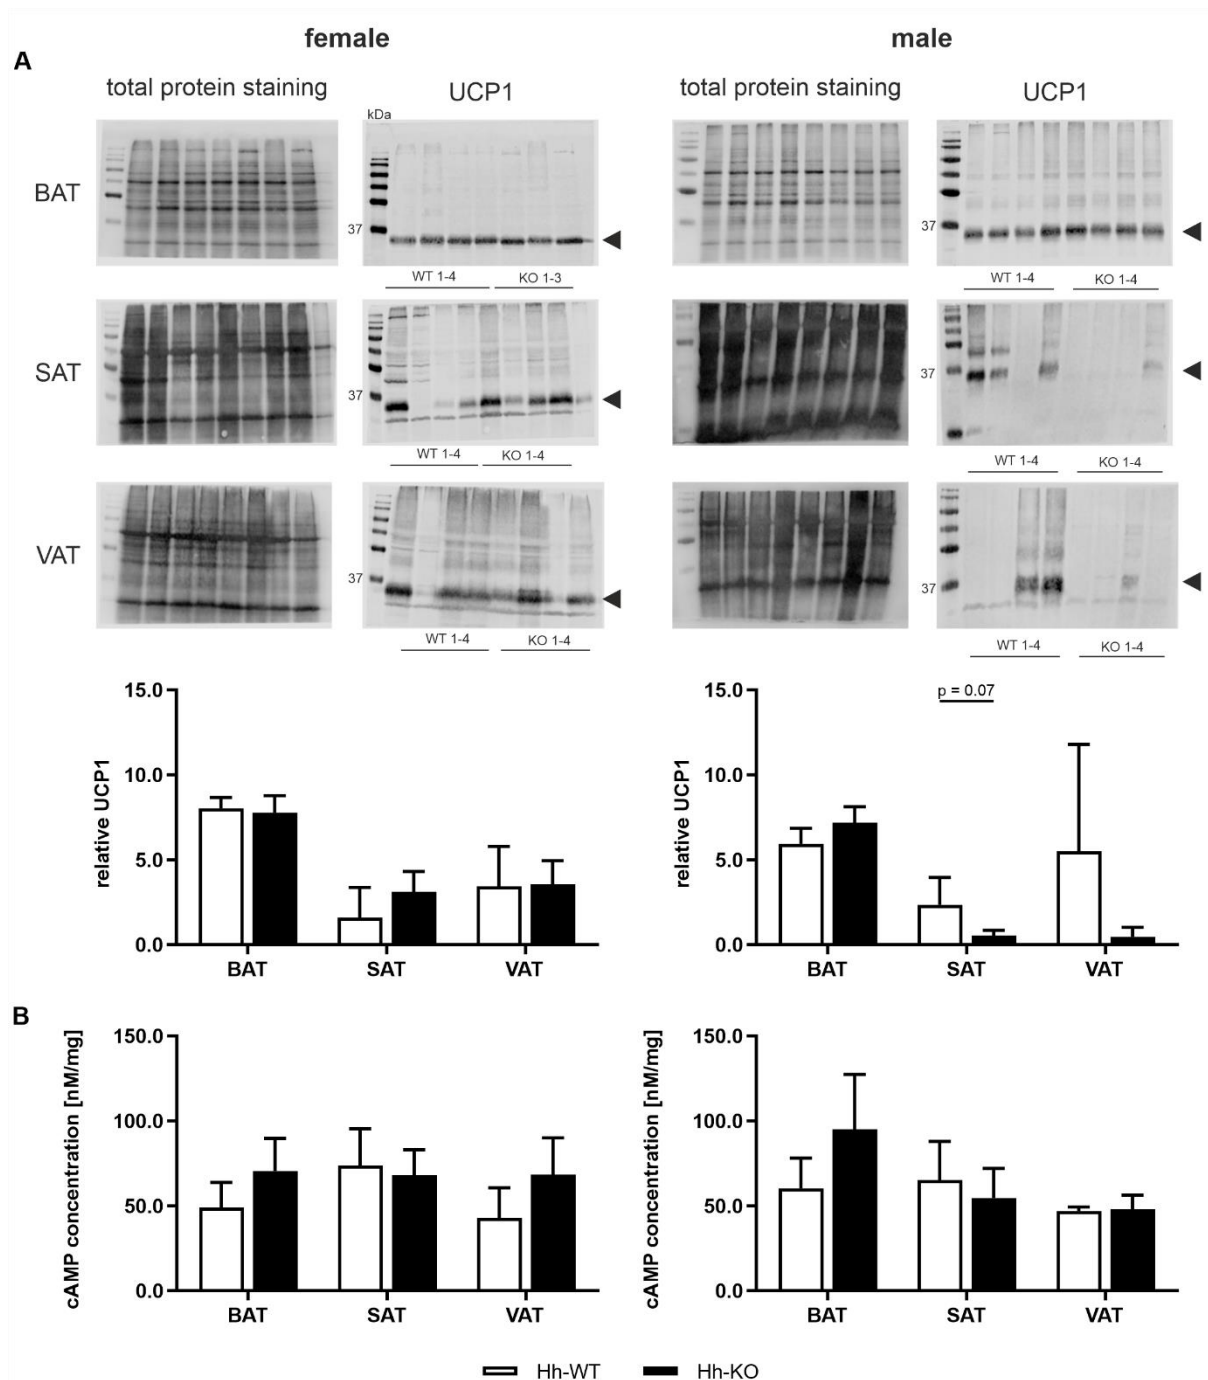

**Figure S5.** Quantitative western blot analysis of UCP1 and cAMP levels in adipose tissue. **(A)** Total protein staining and UCP1 western blot analysis in BAT, SAT and VAT from female and male Hh-WT and Hh-KO mice. Total protein staining was used for normalization of the UCP1 staining signal. **(B)** Basal cAMP levels in BAT, SAT and VAT in female and male Hh-WT and Hh-KO mice.  $n = 3-4$ , multiple unpaired  $t$  tests.

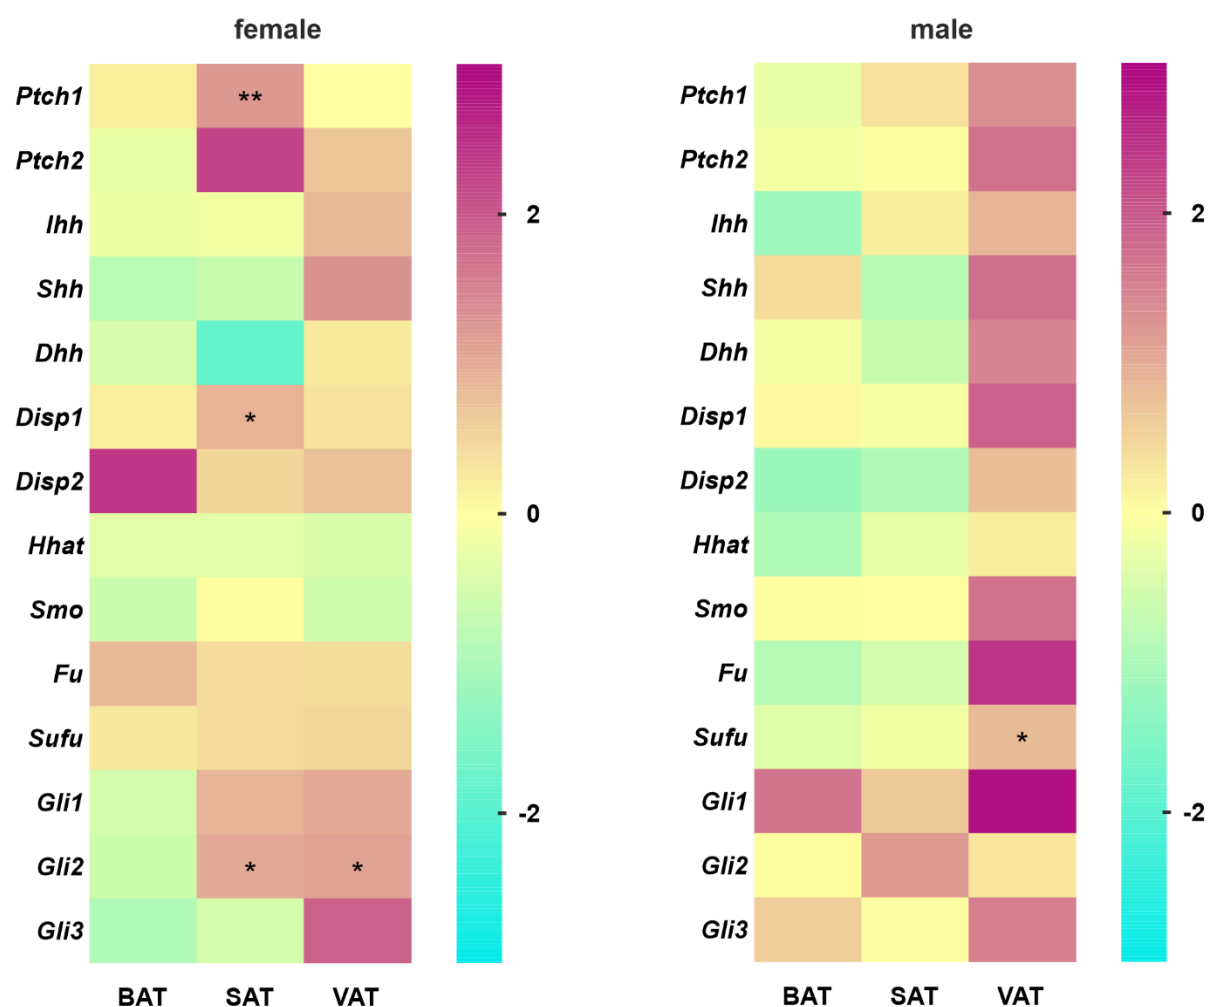

**Figure S6.** Hedgehog signaling-related gene expression profiles. Expression was quantified by qPCR in female and male Hh adipose tissue. Values are plotted as log<sub>2</sub> fold changes, n = 4-6, multiple unpaired t tests with p values \* ≤ 0.05, \*\* ≤ 0.01. Numerical values are available in Table S8.

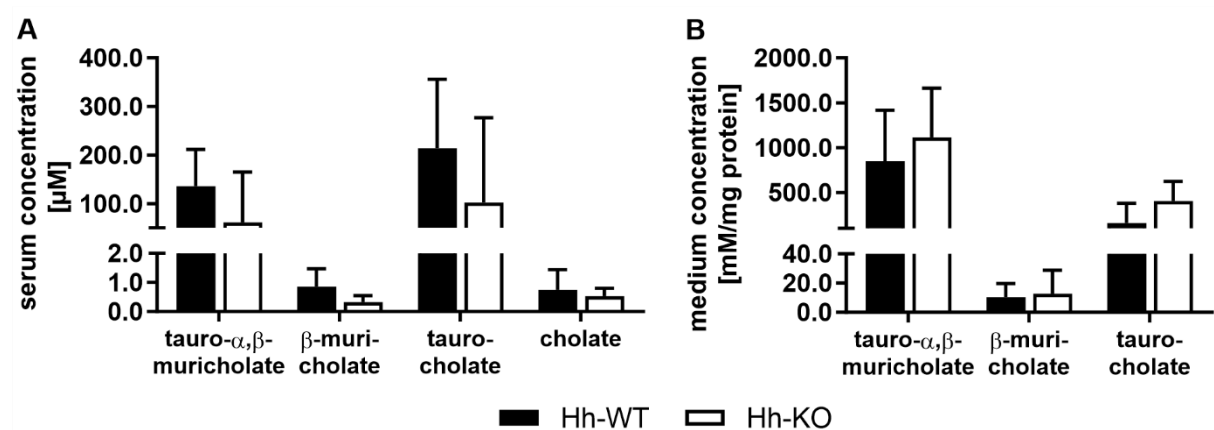

**Figure S7.** Bile acid concentrations. Quantification of bile acids in (A) serum and (B) hepatocyte supernatants from Hh-WT and Hh-KO mice. n = 3-6, multiple unpaired t tests.

## Supplementary Tables

**Table S1.** Forward and reverse primer sequences used for qPCR.

| gene name       | forward primer                 | reverse primer         |
|-----------------|--------------------------------|------------------------|
| <i>Apat</i>     | AAGTATAACCCCCAGTTCGGC          | TACCACACGTCGCAGACAAT   |
| <i>Cox8b</i>    | CCAGCCAAAACCTCCACTT            | GAACCATGAAGCCAACGAC    |
| <i>Dhh</i>      | CACGTATCGGTCAAAGCTGA           | TAGTTCCTCAGCCCCTTC     |
| <i>Disp1</i>    | CTTCAGCAGGAGGGGAGAC            | TGGCGATGTAATTCCCCAGG   |
| <i>Disp2</i>    | AGGGCCGAGGAAAGTGTG             | GCTCCTGTTCTATGCGACAC   |
| <i>Fasn</i>     | TAGAGGGAGCCAGAGAGACG           | TTGGCCCAGAACTCCTGTAG   |
| <i>Fu</i>       | TGCCTCTCAGCCTTCTTAGG           | TAAGAGCGCCCCATACCA     |
| <i>Gli1</i>     | Qiagen QuantiTect Primer Assay |                        |
| <i>Gli2</i>     | Qiagen QuantiTect Primer Assay |                        |
| <i>Gli3</i>     | Qiagen QuantiTect Primer Assay |                        |
| <i>Hhat</i>     | CTGGGAGTCACTGTGGAGAG           | TGAGCATGGAGGTAGAGCAG   |
| <i>Ihh</i>      | GCTCACCCCCAACTACAATC           | GCGGCCCTCATAGTGTAAG    |
| <i>Mpzl2</i>    | TGTGCTTCCACTTCTCCTGA           | TCCACAGCTTCTGTAGGACAAA |
| <i>Pdk4</i>     | TGTGGTCCCTACAATGGCTC           | CCACATCACAGTTTGGGTCTG  |
| <i>Ppara</i>    | CGTACGGCAATGGCTTTATC           | TCATCTGGATGGTTGCTCTG   |
| <i>Pparg</i>    | ATGGAAGACCACTCGCATTC           | GCTTTATCCCCACAGACTCG   |
| <i>Ppargc1a</i> | GGACAGAATTGAGAGACCGC           | CGTCCACAAAAGTACAGCTCG  |
| <i>Prdm16</i>   | CGAGAAGTTCTGCGTGGATG           | AGGCACCTTCTTTCACATGC   |
| <i>Ptch1</i>    | ACTCCAAAAGAAGAAGGCGC           | CCAGAAGCAGTCCAAAGGTG   |
| <i>Ptch2</i>    | CCGAGTGGCTGTAATTGAGAC          | CTGGAGGTGCAAGTCAAGTG   |
| <i>Shh</i>      | TCCAAAGCTCACATCCACTG           | CTCCGGGACGTAAGTCCTTC   |
| <i>Smo</i>      | GCAAGCTCGTGCTCTGGT             | GGGCATGTAGACAGCACACA   |
| <i>Srebf1a</i>  | CAGACACTGGCCGAGATG             | AAACAGGCCCGGGAAGTC     |
| <i>Srebf1c</i>  | GAGCCATGGATTGCACATTTG          | AGGCCAGAGAAGCAGAAGAG   |
| <i>Sufu</i>     | CTTCCAGTCAGAGAACACCT           | TTGGGCTGAATGTAACCTCT   |
| <i>Tmem26</i>   | TGGTGTGGACGTGGAGTATG           | GGTTTGGGGCTTTCTGGATG   |
| <i>Ucp1</i>     | GGCCTCTACGACTCAGTCCA           | TAAGCCGGCTGAGATCTTGT   |
| <i>Ywhaz</i>    | TTACTTGGCCGAGGTTGCT            | TGCTGTGACTGGTCCACAAT   |

**Table S2.** Significantly changed lipid species in SAT adipose tissue from female Hh-KO compared to Hh-WT mice.

| lipid specie | fold change | log2(FC) | raw p value |
|--------------|-------------|----------|-------------|
| TG 40:1:0    | 0.33381     | -1.5829  | 0.00020198  |
| PE 44:7:0    | 0.29431     | -1.7646  | 0.00044111  |
| TG 36:0:0    | 0.29036     | -1.7841  | 0.00050384  |
| TG 38:1:0    | 0.31787     | -1.6535  | 0.00050828  |
| DG 36:1:0    | 0.27978     | -1.8376  | 0.0010552   |
| CE 18:1:0    | 0.27607     | -1.8569  | 0.0010989   |
| PE 42:7:0    | 0.36157     | -1.4676  | 0.0011177   |
| PE O- 34:2:0 | 0.23029     | -2.1185  | 0.0022397   |
| TG 36:1:0    | 0.42910     | -1.2206  | 0.0025228   |
| PC 38:4:0    | 0.30720     | -1.7028  | 0.0025786   |
| SM 34:1:2    | 0.42812     | -1.2239  | 0.0032551   |
| TG 50:1:0    | 0.39347     | -1.34570 | 0.004175    |



|              |         |          |           |
|--------------|---------|----------|-----------|
| SM 36:1:2    | 0.40076 | -1.31920 | 0.0043404 |
| SM 34:1:3    | 0.54313 | -0.88063 | 0.0045952 |
| PE O- 36:2:0 | 0.16177 | -2.62800 | 0.0047516 |
| PE 36:1:0    | 0.29140 | -1.77900 | 0.0053997 |
| PC O- 36:5:0 | 0.25307 | -1.98240 | 0.0063187 |
| LPC 18:0:0   | 0.32003 | -1.64370 | 0.0065327 |
| PS 36:1:0    | 0.22738 | -2.13680 | 0.0069129 |
| TG 52:2:0    | 0.45124 | -1.14800 | 0.0069496 |
| TG 37:0:0    | 0.44343 | -1.17320 | 0.0071863 |
| LPC 20:4:0   | 0.21589 | -2.21160 | 0.007924  |
| SM 36:2:2    | 0.48070 | -1.05680 | 0.0079363 |
| PS 38:0:0    | 0.37886 | -1.40030 | 0.0088746 |
| TG 40:2:0    | 0.47644 | -1.06960 | 0.0089333 |
| PE 42:8:0    | 0.48996 | -1.02930 | 0.011893  |
| PC 33:2:0    | 0.23583 | -2.08420 | 0.01198   |
| PE O- 38:5:0 | 0.32608 | -1.61670 | 0.012397  |
| PE O- 36:5:0 | 0.37068 | -1.43180 | 0.01245   |
| PE O- 38:6:0 | 0.31739 | -1.65570 | 0.01246   |
| PE O- 36:3:0 | 0.21505 | -2.21730 | 0.014042  |
| SM 42:2:2    | 0.47781 | -1.06550 | 0.014905  |
| PC 32:0:0    | 0.40096 | -1.31850 | 0.014992  |
| TG 54:3:0    | 0.45635 | -1.13180 | 0.015523  |
| PC 34:1:0    | 0.37739 | -1.40590 | 0.017115  |
| PC 35:1:0    | 0.40279 | -1.31190 | 0.01787   |
| PE 36:2:0    | 0.45637 | -1.13170 | 0.018181  |
| DG 42:8:0    | 0.44271 | -1.17560 | 0.018631  |
| TG 37:1:0    | 0.54092 | -0.88651 | 0.020191  |
| PC 38:5:0    | 0.45307 | -1.14220 | 0.020414  |
| PS 38:4:0    | 0.45643 | -1.13150 | 0.022402  |
| TG 49:1:0    | 0.57035 | -0.81007 | 0.02431   |
| TG 38:2:0    | 0.46614 | -1.10120 | 0.024563  |
| PE O- 38:7:0 | 0.46850 | -1.09390 | 0.024896  |
| PE O- 40:7:0 | 0.41930 | -1.25390 | 0.025291  |
| PC 40:6:0    | 0.50034 | -0.99901 | 0.025932  |
| PE O- 39:5:0 | 0.38866 | -1.36340 | 0.026357  |
| CE 18:2:0    | 0.39014 | -1.35790 | 0.029123  |
| LPC 16:0:0   | 0.44701 | -1.16160 | 0.029677  |
| PC 36:4:0    | 0.45146 | -1.14730 | 0.032026  |
| PC 40:4:0    | 0.40860 | -1.29120 | 0.033343  |
| LPE 18:0:0   | 0.39997 | -1.32200 | 0.034068  |
| PC 35:5:0    | 0.46864 | -1.09350 | 0.03444   |
| PE 34:1:0    | 0.50525 | -0.98492 | 0.036002  |
| TG 46:0:0    | 0.45735 | -1.12860 | 0.036087  |
| DG 34:2:0    | 0.57057 | -0.80952 | 0.037021  |
| PC 36:2:0    | 0.51431 | -0.95928 | 0.037114  |
| PE 40:4:0    | 0.46985 | -1.08970 | 0.039845  |
| PE O- 40:6:0 | 0.46579 | -1.10230 | 0.040253  |
| TG 53:2:0    | 0.56188 | -0.83168 | 0.042248  |

|               |         |          |          |
|---------------|---------|----------|----------|
| TG 48:4:0     | 2.19660 | 1.13530  | 0.042911 |
| PC O- 34:1:0  | 0.57579 | -0.79638 | 0.043363 |
| LPE 20:4:0    | 0.52970 | -0.91676 | 0.043673 |
| LPE 18:1:0    | 0.33459 | -1.57950 | 0.045743 |
| TG 60:1:0     | 0.51717 | -0.95130 | 0.046117 |
| PC O- 38:11:0 | 0.49283 | -1.02080 | 0.046615 |
| PS 38:3:0     | 0.56647 | -0.81994 | 0.049472 |
| SM 42:1:2     | 0.49105 | -1.02610 | 0.049661 |

**Table S3.** Significantly changed lipid species in SAT adipose tissue from male Hh-KO compared to Hh-WT mice.

| lipid specie | fold change | log2(FC) | raw p value |
|--------------|-------------|----------|-------------|
| TG 44:5:0    | 1.80040     | 0.84835  | 0.024026    |
| TG 46:5:0    | 1.90170     | 0.92731  | 0.033319    |
| TG 44:4:0    | 1.68070     | 0.74904  | 0.048773    |
| DG 33:1:0    | 0.34448     | -1.53750 | 0.04983     |

**Table S4.** Significantly changed lipid species in VAT adipose tissue from female Hh-KO compared to Hh-WT mice.

| lipid specie | fold change | log2(FC) | raw p value |
|--------------|-------------|----------|-------------|
| TAG [60:2]   | 0.028521    | -5.13180 | 7.06E-05    |
| PA [38:4]    | 0.22572     | -2.14740 | 9.93E-05    |
| LPC [18:1]   | 0.38589     | -1.37370 | 0.00011788  |
| LPE [18:1]   | 0.40238     | -1.31340 | 0.00059117  |
| PC [34:1]    | 0.40000     | -1.32190 | 0.00067996  |
| LPC [18:0]   | 0.409810    | -1.28700 | 0.00091694  |
| PG [37:5]    | 0.013574    | -6.20300 | 0.0016002   |
| PA [36:2]    | 0.139780    | -2.83880 | 0.0018955   |
| LPE [18:0]   | 0.37024     | -1.43350 | 0.0021976   |
| LPC [16:1]   | 0.50522     | -0.98503 | 0.0022691   |
| PA [40:6]    | 0.25376     | -1.97850 | 0.0024683   |
| LPC [16:0]   | 0.53103     | -0.91314 | 0.0025391   |
| PG [34:1]    | 0.41550     | -1.26710 | 0.0027286   |
| SM [36:1]    | 0.57208     | -0.80572 | 0.0027715   |
| PI [38:4]    | 0.49416     | -1.01690 | 0.0028313   |
| LPE [18:2]   | 0.47408     | -1.07680 | 0.0034458   |
| DAG [38:6]   | 18.17900    | 4.18420  | 0.0035224   |
| PG [36:2]    | 0.38710     | -1.36920 | 0.0035892   |
| SM [36:2]    | 0.54645     | -0.87183 | 0.0036618   |
| DAG [34:4]   | 4.48260     | 2.16430  | 0.0040137   |
| LPC [20:4]   | 0.45186     | -1.14610 | 0.0048770   |
| LPC [18:2]   | 0.48933     | -1.03110 | 0.0052756   |
| DAG [36:5]   | 3.94510     | 1.98010  | 0.0053088   |
| LPC [17:0]   | 0.29604     | -1.75620 | 0.0055779   |
| DAG [36:4]   | 5.14430     | 2.36300  | 0.0067521   |
| DAG [34:3]   | 3.70390     | 1.88910  | 0.0085195   |
| TAG [52:6]   | 3.33590     | 1.73810  | 0.0086328   |
| LPE [20:4]   | 0.52293     | -0.93532 | 0.0087184   |

|            |          |          |           |
|------------|----------|----------|-----------|
| DAG [36:1] | 0.66606  | -0.58628 | 0.0112960 |
| DAG [32:2] | 3.10960  | 1.63670  | 0.012049  |
| PG [40:7]  | 0.32414  | -1.62530 | 0.01215   |
| TAG [50:5] | 3.02320  | 1.59610  | 0.012509  |
| TAG [50:4] | 2.91000  | 1.54100  | 0.013925  |
| TAG [48:3] | 2.61080  | 1.38450  | 0.015026  |
| DAG [36:3] | 3.53970  | 1.82360  | 0.016909  |
| PG [38:6]  | 0.28134  | -1.82960 | 0.017459  |
| TAG [54:7] | 2.83500  | 1.50340  | 0.017504  |
| TAG [46:2] | 2.10410  | 1.07320  | 0.018382  |
| DAG [32:1] | 2.43690  | 1.28500  | 0.019569  |
| TAG [49:3] | 2.61590  | 1.38730  | 0.020826  |
| LPC [22:6] | 0.25287  | -1.98350 | 0.021971  |
| PC [36:2]  | 0.58721  | -0.76804 | 0.022001  |
| PC [36:5]  | 0.58202  | -0.78085 | 0.022041  |
| TAG [52:5] | 2.68220  | 1.42340  | 0.022795  |
| DAG [38:5] | 4.14200  | 2.05030  | 0.025174  |
| PG [36:1]  | 0.31309  | -1.67540 | 0.026177  |
| TAG [46:3] | 2.321000 | 1.21470  | 0.028177  |
| TAG [46:1] | 1.69570  | 0.76185  | 0.028514  |
| PG [36:3]  | 0.53125  | -0.91254 | 0.028768  |
| TAG [48:2] | 1.88310  | 0.913100 | 0.02926   |
| TAG [50:3] | 2.13440  | 1.09380  | 0.029971  |
| TAG [56:8] | 4.80390  | 2.26420  | 0.031937  |
| TAG [44:1] | 1.63480  | 0.70912  | 0.033004  |
| PC [32:0]  | 0.63522  | -0.65468 | 0.033217  |
| TAG [48:4] | 2.42220  | 1.27630  | 0.034962  |
| LPE [16:0] | 0.61977  | -0.69019 | 0.035763  |
| PC [40:6]  | 0.53614  | -0.89933 | 0.039578  |
| DAG [34:2] | 2.15380  | 1.10690  | 0.040815  |
| TAG [51:4] | 2.41720  | 1.27330  | 0.041785  |
| PC [32:2]  | 0.55483  | -0.84987 | 0.044931  |
| DAG [32:0] | 1.80600  | 0.85280  | 0.047110  |
| PC [38:4]  | 0.55043  | -0.86138 | 0.047216  |

**Table S5.** Significantly changed lipid species in VAT adipose tissue from male Hh-KO compared to Hh-WT mice.

| lipid specie | fold change | log2(FC) | raw p value |
|--------------|-------------|----------|-------------|
| PG [40:7]    | 10.34700    | 3.37110  | 0.0030337   |
| PS [38:5]    | 0.57389     | -0.80115 | 0.016384    |
| PS [40:4]    | 0.46698     | -1.09860 | 0.022656    |
| PS [36:1]    | 0.10478     | -3.25460 | 0.038168    |
| PG [34:1]    | 3.24250     | 1.69710  | 0.039762    |

**Table S6.** Numeric values of expression analysis of browning-related genes in (A) female and (B) male Hh mice adipose tissue quantified by qPCR shown in Figure 4A as heatmap.

**Table S6A.** Female Hh mice

| gene name     | tissue | Hh-WT    |         | Hh-KO    |         |
|---------------|--------|----------|---------|----------|---------|
|               |        | mean     | SD      | mean     | SD      |
| <i>Ucp1</i>   | BAT    | 1262.796 | 712.070 | 1514.575 | 664.074 |
|               | SAT    | 0.024    | 0.020   | 14.040   | 15.068  |
|               | VAT    | 1.820    | 1.578   | 26.950   | 31.449  |
| <i>Cox8b</i>  | BAT    | 54.859   | 29.015  | 36.949   | 15.797  |
|               | SAT    | 0.529    | 0.329   | 1.850    | 1.521   |
|               | VAT    | 0.987    | 0.571   | 2.440    | 1.715   |
| <i>Prdm16</i> | BAT    | 6.912    | 2.831   | 6.058    | 2.652   |
|               | SAT    | 12.041   | 11.587  | 7.411    | 4.892   |
|               | VAT    | 1.131    | 0.670   | 5.884    | 3.032   |
| <i>Ppara</i>  | BAT    | 31.223   | 9.755   | 67.229   | 18.206  |
|               | SAT    | 0.183    | 0.156   | 4.917    | 5.949   |
|               | VAT    | 1.109    | 0.751   | 7.448    | 9.132   |
| <i>Mpzl2</i>  | BAT    | 7.180    | 2.837   | 8.734    | 3.572   |
|               | SAT    | 1.108    | 0.681   | 1.176    | 0.804   |
|               | VAT    | 3.332    | 2.509   | 2.466    | 1.097   |
| <i>Tmem26</i> | BAT    | 5.111    | 3.587   | 5.038    | 3.757   |
|               | SAT    | 24.439   | 20.409  | 3.367    | 3.282   |
|               | VAT    | 22.023   | 9.788   | 9.541    | 4.082   |

**Table S6B.** Male Hh mice

| gene name     | tissue | Hh-WT   |         | Hh-KO   |         |
|---------------|--------|---------|---------|---------|---------|
|               |        | mean    | SD      | mean    | SD      |
| <i>Ucp1</i>   | BAT    | 418.970 | 269.136 | 506.378 | 199.057 |
|               | SAT    | 5.970   | 3.419   | 31.018  | 49.667  |
|               | VAT    | 5.081   | 7.918   | 10.866  | 17.045  |
| <i>Cox8b</i>  | BAT    | 8.710   | 1.628   | 6.104   | 1.563   |
|               | SAT    | 0.278   | 0.164   | 0.336   | 0.505   |
|               | VAT    | 0.007   | 0.002   | 0.040   | 0.049   |
| <i>Prdm16</i> | BAT    | 15.710  | 7.365   | 7.513   | 1.830   |
|               | SAT    | 3.729   | 0.914   | 4.155   | 1.748   |
|               | VAT    | 2.229   | 0.967   | 7.524   | 7.767   |
| <i>Ppara</i>  | BAT    | 92.563  | 29.853  | 131.459 | 8.807   |
|               | SAT    | 5.287   | 3.050   | 3.957   | 4.479   |
|               | VAT    | 2.777   | 0.763   | 3.475   | 3.818   |
| <i>Mpzl2</i>  | BAT    | 1.186   | 0.159   | 0.747   | 0.317   |
|               | SAT    | 0.200   | 0.124   | 0.045   | 0.027   |
|               | VAT    | 0.158   | 0.053   | 0.144   | 0.131   |
| <i>Tmem26</i> | BAT    | 3.415   | 3.423   | 3.419   | 2.805   |
|               | SAT    | 44.894  | 28.173  | 18.683  | 8.070   |
|               | VAT    | 9.229   | 4.848   | 35.514  | 24.352  |

**Table S7.** Numeric values of expression analysis of lipid synthesis-related genes in (A) female and (B) male SAC adipose tissue quantified by qPCR shown in Figure 4B as heatmap.

**Table S7A.** Female Hh mice

| gene name       | tissue | Hh-WT   |         | Hh-KO   |         |
|-----------------|--------|---------|---------|---------|---------|
|                 |        | mean    | SD      | mean    | SD      |
| <i>Fasn</i>     | BAT    | 0.25519 | 0.03738 | 0.27796 | 0.08601 |
|                 | SAT    | 0.04512 | 0.03395 | 0.16481 | 0.06059 |
|                 | VAT    | 0.13667 | 0.08534 | 0.20400 | 0.12671 |
| <i>Agpat</i>    | BAT    | 0.00083 | 0.00013 | 0.00103 | 0.00019 |
|                 | SAT    | 0.00129 | 0.00075 | 0.00197 | 0.00083 |
|                 | VAT    | 0.00415 | 0.00362 | 0.00244 | 0.00153 |
| <i>Pdk4</i>     | BAT    | 0.40141 | 0.09857 | 0.65438 | 0.23361 |
|                 | SAT    | 0.02916 | 0.01041 | 0.10675 | 0.08653 |
|                 | VAT    | 0.09025 | 0.04992 | 0.14615 | 0.07763 |
| <i>Srebfla</i>  | BAT    | 0.00112 | 0.00058 | 0.00079 | 0.00046 |
|                 | SAT    | 0.00015 | 0.00017 | 0.00047 | 0.00015 |
|                 | VAT    | 0.00068 | 0.00048 | 0.00095 | 0.00082 |
| <i>Srebflc</i>  | BAT    | 0.01971 | 0.00602 | 0.01873 | 0.00854 |
|                 | SAT    | 0.00357 | 0.00184 | 0.00947 | 0.00591 |
|                 | VAT    | 0.01358 | 0.01292 | 0.00969 | 0.00643 |
| <i>Ppargc1a</i> | BAT    | 0.12619 | 0.12783 | 0.04135 | 0.01597 |
|                 | SAT    | 0.05278 | 0.02282 | 0.02735 | 0.00431 |
|                 | VAT    | 0.03014 | 0.01669 | 0.02030 | 0.00274 |

**Table S7B.** Male Hh mice

| gene name       | tissue | Hh-WT   |         | Hh-KO   |         |
|-----------------|--------|---------|---------|---------|---------|
|                 |        | mean    | SD      | mean    | SD      |
| <i>Fasn</i>     | BAT    | 3.79897 | 1.28528 | 2.48848 | 0.98842 |
|                 | SAT    | 0.48474 | 0.12379 | 0.14522 | 0.08801 |
|                 | VAT    | 0.21453 | 0.15567 | 0.15534 | 0.14725 |
| <i>Agpat</i>    | BAT    | 0.00106 | 0.00032 | 0.00078 | 0.00061 |
|                 | SAT    | 0.00167 | 0.00054 | 0.00137 | 0.00096 |
|                 | VAT    | 0.00484 | 0.00192 | 0.00072 | 0.00031 |
| <i>Pdk4</i>     | BAT    | 0.71462 | 0.33234 | 1.43578 | 0.87648 |
|                 | SAT    | 0.05902 | 0.02926 | 0.06867 | 0.04303 |
|                 | VAT    | 0.04390 | 0.04362 | 0.12122 | 0.08036 |
| <i>Srebfla</i>  | BAT    | 0.00875 | 0.00531 | 0.00813 | 0.00596 |
|                 | SAT    | 0.00196 | 0.00014 | 0.00116 | 0.00081 |
|                 | VAT    | 0.00279 | 0.00138 | 0.00264 | 0.00109 |
| <i>Srebflc</i>  | BAT    | 0.06093 | 0.03793 | 0.02828 | 0.01682 |
|                 | SAT    | 0.00560 | 0.00423 | 0.00237 | 0.00236 |
|                 | VAT    | 0.01303 | 0.00543 | 0.00620 | 0.00379 |
| <i>Ppargc1a</i> | BAT    | 0.10433 | 0.07613 | 0.07736 | 0.09534 |
|                 | SAT    | 0.00663 | 0.00276 | 0.00150 | 0.00074 |
|                 | VAT    | 0.00567 | 0.00161 | 0.00510 | 0.00199 |

**Table S8.** Numeric values of expression analysis of Hedgehog-related genes in (A) female and (B) male SAC adipose tissue quantified by qPCR shown in Figure S6 as heatmap.

**Table S8A.** Female Hh mice

| gene name    | tissue | Hh-WT   |         | Hh-KO   |         |
|--------------|--------|---------|---------|---------|---------|
|              |        | mean    | SD      | mean    | SD      |
| <i>Ptch1</i> | BAT    | 0.03790 | 0.01556 | 0.04321 | 0.01700 |
|              | SAT    | 0.00715 | 0.00266 | 0.01684 | 0.00371 |
|              | VAT    | 0.02004 | 0.00551 | 0.01984 | 0.01117 |
| <i>Ptch2</i> | BAT    | 0.00400 | 0.00142 | 0.00335 | 0.00160 |
|              | SAT    | 0.00236 | 0.00110 | 0.01122 | 0.00649 |
|              | VAT    | 0.00878 | 0.00252 | 0.01414 | 0.01117 |
| <i>Ihh</i>   | BAT    | 0.00055 | 0.00050 | 0.00047 | 0.00038 |
|              | SAT    | 0.00175 | 0.00214 | 0.00156 | 0.00118 |
|              | VAT    | 0.00069 | 0.00041 | 0.00123 | 0.00063 |
| <i>Shh</i>   | BAT    | 0.00005 | 0.00004 | 0.00003 | 0.00003 |
|              | SAT    | 0.00016 | 0.00012 | 0.00010 | 0.00011 |
|              | VAT    | 0.00011 | 0.00009 | 0.00026 | 0.00028 |
| <i>Dhh</i>   | BAT    | 0.00076 | 0.00040 | 0.00054 | 0.00050 |
|              | SAT    | 0.00111 | 0.00142 | 0.00032 | 0.00024 |
|              | VAT    | 0.00017 | 0.00005 | 0.00020 | 0.00009 |
| <i>Disp1</i> | BAT    | 0.02369 | 0.01035 | 0.02688 | 0.01203 |
|              | SAT    | 0.00396 | 0.00099 | 0.00744 | 0.00178 |
|              | VAT    | 0.01322 | 0.00429 | 0.01680 | 0.01254 |
| <i>Disp2</i> | BAT    | 0.00026 | 0.00016 | 0.00139 | 0.00304 |
|              | SAT    | 0.00046 | 0.00054 | 0.00065 | 0.00034 |
|              | VAT    | 0.00062 | 0.00024 | 0.00103 | 0.00086 |
| <i>Hhat</i>  | BAT    | 0.00224 | 0.00078 | 0.00178 | 0.00083 |
|              | SAT    | 0.00280 | 0.00277 | 0.00223 | 0.00116 |
|              | VAT    | 0.00362 | 0.00128 | 0.00264 | 0.00118 |
| <i>Smo</i>   | BAT    | 0.16542 | 0.08355 | 0.10829 | 0.05673 |
|              | SAT    | 0.16501 | 0.08193 | 0.16530 | 0.09195 |
|              | VAT    | 0.33338 | 0.09595 | 0.22280 | 0.10940 |
| <i>Fu</i>    | BAT    | 0.00201 | 0.00079 | 0.00356 | 0.00398 |
|              | SAT    | 0.00183 | 0.00215 | 0.00245 | 0.00167 |
|              | VAT    | 0.00173 | 0.00112 | 0.00229 | 0.00104 |
| <i>Sufu</i>  | BAT    | 0.01678 | 0.00521 | 0.02033 | 0.00660 |
|              | SAT    | 0.00643 | 0.00420 | 0.00866 | 0.00241 |
|              | VAT    | 0.00908 | 0.00187 | 0.01261 | 0.00463 |
| <i>Gli1</i>  | BAT    | 0.24822 | 0.32424 | 0.17591 | 0.10338 |
|              | SAT    | 0.26155 | 0.30188 | 0.48731 | 0.28160 |
|              | VAT    | 0.26669 | 0.13445 | 0.54032 | 0.18560 |
| <i>Gli2</i>  | BAT    | 0.05296 | 0.01615 | 0.03480 | 0.01296 |
|              | SAT    | 0.02621 | 0.01181 | 0.05245 | 0.00924 |
|              | VAT    | 0.06339 | 0.01376 | 0.13700 | 0.05662 |
| <i>Gli3</i>  | BAT    | 1.19060 | 0.94325 | 0.62026 | 0.18718 |
|              | SAT    | 2.77699 | 3.03925 | 1.95884 | 0.96843 |
|              | VAT    | 0.92247 | 0.59301 | 3.39159 | 2.70223 |

**Table S8B.** Male Hh mice

| gene name    | tissue | Hh-WT   |         | Hh-KO   |         |
|--------------|--------|---------|---------|---------|---------|
|              |        | mean    | SD      | mean    | SD      |
| <i>Ptch1</i> | BAT    | 0.02230 | 0.01016 | 0.01858 | 0.00924 |
|              | SAT    | 0.00628 | 0.00320 | 0.00799 | 0.00510 |
|              | VAT    | 0.01283 | 0.00407 | 0.03279 | 0.01657 |
| <i>Ptch2</i> | BAT    | 0.00126 | 0.00106 | 0.00115 | 0.00065 |
|              | SAT    | 0.00189 | 0.00112 | 0.00191 | 0.00117 |
|              | VAT    | 0.00282 | 0.00134 | 0.00921 | 0.00788 |
| <i>Ihh</i>   | BAT    | 0.00017 | 0.00015 | 0.00008 | 0.00001 |
|              | SAT    | 0.00016 | 0.00012 | 0.00019 | 0.00017 |
|              | VAT    | 0.00061 | 0.00054 | 0.00114 | 0.00106 |
| <i>Shh</i>   | BAT    | 0.00008 | 0.00009 | 0.00011 | 0.00007 |
|              | SAT    | 0.00051 | 0.00068 | 0.00028 | 0.00022 |
|              | VAT    | 0.00075 | 0.00060 | 0.00247 | 0.00220 |
| <i>Dhh</i>   | BAT    | 0.00046 | 0.00024 | 0.00041 | 0.00025 |
|              | SAT    | 0.00037 | 0.00013 | 0.00024 | 0.00016 |
|              | VAT    | 0.00022 | 0.00007 | 0.00060 | 0.00036 |
| <i>Disp1</i> | BAT    | 0.00549 | 0.00327 | 0.00573 | 0.00252 |
|              | SAT    | 0.00164 | 0.00095 | 0.00150 | 0.00144 |
|              | VAT    | 0.00180 | 0.00076 | 0.00670 | 0.00434 |
| <i>Disp2</i> | BAT    | 0.00154 | 0.00069 | 0.00068 | 0.00054 |
|              | SAT    | 0.00201 | 0.00091 | 0.00107 | 0.00056 |
|              | VAT    | 0.00179 | 0.00084 | 0.00306 | 0.00301 |
| <i>Hhat</i>  | BAT    | 0.00394 | 0.00204 | 0.00208 | 0.00107 |
|              | SAT    | 0.00231 | 0.00100 | 0.00191 | 0.00139 |
|              | VAT    | 0.00297 | 0.00101 | 0.00346 | 0.00079 |
| <i>Smo</i>   | BAT    | 0.06473 | 0.01504 | 0.06518 | 0.03451 |
|              | SAT    | 0.04761 | 0.00950 | 0.04744 | 0.01850 |
|              | VAT    | 0.05346 | 0.02139 | 0.17248 | 0.12004 |
| <i>Fu</i>    | BAT    | 0.00083 | 0.00046 | 0.00045 | 0.00032 |
|              | SAT    | 0.00024 | 0.00012 | 0.00017 | 0.00005 |
|              | VAT    | 0.00029 | 0.00010 | 0.00154 | 0.00201 |
| <i>Sufu</i>  | BAT    | 0.01770 | 0.00490 | 0.01348 | 0.00461 |
|              | SAT    | 0.00411 | 0.00226 | 0.00362 | 0.00205 |
|              | VAT    | 0.00652 | 0.00119 | 0.01140 | 0.00295 |
| <i>Gli1</i>  | BAT    | 0.00053 | 0.00051 | 0.00167 | 0.00202 |
|              | SAT    | 0.00042 | 0.00039 | 0.00066 | 0.00052 |
|              | VAT    | 0.00056 | 0.00027 | 0.00412 | 0.00446 |
| <i>Gli2</i>  | BAT    | 0.00234 | 0.00129 | 0.00235 | 0.00183 |
|              | SAT    | 0.00119 | 0.00047 | 0.00277 | 0.00164 |
|              | VAT    | 0.00587 | 0.00128 | 0.00718 | 0.00617 |
| <i>Gli3</i>  | BAT    | 0.08375 | 0.01146 | 0.12537 | 0.11324 |
|              | SAT    | 0.16536 | 0.11603 | 0.16043 | 0.09279 |
|              | VAT    | 0.14195 | 0.11451 | 0.41022 | 0.26150 |

**Table S9.** Binding sites of GLI1 in hepatocytes of male C57BL/6N mice identified by ChIP-seq associated to FGF21 signaling.

| chromosome | start       | end         | length | peak summit | peak val | avg val | genes                       | dist to start     | position                         |
|------------|-------------|-------------|--------|-------------|----------|---------|-----------------------------|-------------------|----------------------------------|
| 2          | 94.157.949  | 94.158.349  | 400    | 94.158.096  | 84       | 65      | Hsd17b12                    | -187              | upstream                         |
| 2          | 157.737.324 | 157.737.573 | 249    | 157.737.344 | 27       | 22      | Ctnnb1                      | -57               | upstream                         |
| 4          | 118.437.253 | 118.437.607 | 354    | 118.437.440 | 81       | 54      | Elovl1, Cdc20, Mpl          | 9347, -97, 20055  | downstream, upstream, downstream |
| 4          | 148.448.303 | 148.448.663 | 360    | 148.448.384 | 48       | 37      | Ubiad1, Mtor                | -3633, -198       | upstream, upstream               |
| 4          | 148.558.214 | 148.558.791 | 577    | 148.558.432 | 171      | 102     | Mtor, Exosc10               | 109850, 5         | downstream, in gene              |
| 4          | 107.879.610 | 107.879.882 | 272    | 107.879.680 | 65       | 53      | Lrp8, Magoh                 | 77421, -133       | downstream, upstream             |
| 5          | 114.942.244 | 114.942.454 | 210    | 114.942.272 | 23       | 19      | Oasl1, 2210016L21Rik, Hnf1a | 19032, 70, 28790  | downstream, in gene, downstream  |
| 7          | 113.207.050 | 113.207.403 | 353    | 113.207.232 | 130      | 91      | Arntl                       | -233              | upstream                         |
| 10         | 85.127.971  | 85.128.209  | 238    | 85.128.128  | 37       | 32      | Mterfd3, Cry1               | -101, 56926       | upstream, downstream             |
| 10         | 128.696.203 | 128.696.756 | 553    | 128.696.448 | 160      | 100     | Rab5b, Cdk2, Pmel           | -180, 8603, -9810 | upstream, downstream, upstream   |
| 11         | 95.041.357  | 95.041.579  | 222    | 95.041.472  | 54       | 47      | Pdk2, Itga3                 | -101, 35242       | upstream, downstream             |
| 11         | 69.094.970  | 69.095.194  | 224    | 69.095.072  | 63       | 54      | Vamp2, Per1                 | 6544, -3884       | downstream, upstream             |
| 11         | 69.098.778  | 69.099.097  | 319    | 69.098.880  | 58       | 48      | Vamp2, Per1                 | 10352, -76        | downstream, upstream             |
| 11         | 60.210.320  | 60.210.626  | 306    | 60.210.448  | 84       | 62      | Srebf1                      | 10.156            | in gene                          |
| 11         | 60.222.732  | 60.223.008  | 276    | 60.222.848  | 75       | 60      | Srebf1, Tom1l2              | -2244, 130057     | upstream, downstream             |
| 11         | 98.192.945  | 98.193.603  | 658    | 98.193.312  | 188      | 96      | Med1, Cdk12                 | -19, -9993        | upstream, upstream               |
| 11         | 98.202.156  | 98.203.225  | 1.069  | 98.202.656  | 424      | 179     | Med1, Cdk12                 | -9363, -649       | upstream, upstream               |
| 13         | 96.670.931  | 96.671.177  | 246    | 96.671.008  | 35       | 30      | Hmgcr                       | -72               | upstream                         |
| 13         | 119.689.917 | 119.690.510 | 593    | 119.690.176 | 71       | 49      | 1700074H08Rik, Hmgcs1       | 10134, -286       | downstream, upstream             |
| 14         | 18.238.150  | 18.238.454  | 304    | 18.238.304  | 66       | 52      | Nr1d2                       | 802               | in gene                          |
| 14         | 18.238.548  | 18.239.031  | 483    | 18.238.688  | 46       | 35      | Nr1d2                       | 418               | in gene                          |
| 15         | 6.708.312   | 6.708.534   | 222    | 6.708.448   | 31       | 28      | Rictor                      | 67                | in gene                          |
| 15         | 98.762.840  | 98.763.546  | 706    | 98.763.232  | 283      | 136     | Arf3, Wnt10b                | -114, 14918       | upstream, downstream             |
| 15         | 39.006.241  | 39.006.487  | 246    | 39.006.368  | 34       | 29      | Fzd6                        | 88                | in gene                          |
| 16         | 38.088.775  | 38.089.285  | 510    | 38.088.992  | 103      | 70      | BC031361, Gsk3b             | 268, -9           | in gene, upstream                |
| 18         | 34.330.734  | 34.331.247  | 513    | 34.331.008  | 118      | 69      | Apc, Srp19                  | 110024, -137      | downstream, upstream             |
| 19         | 46.395.115  | 46.395.481  | 366    | 46.395.264  | 78       | 58      | Actr1a, Sufu                | 471, -1654        | in gene, upstream                |
| 19         | 3.575.556   | 3.576.065   | 509    | 3.575.872   | 50       | 40      | Ppp6r3, Lrp5                | -123, 110692      | upstream, downstream             |
